# Supplementary material
Source: PubMed Central journal article supplement (PMC3732958)
Supplement: 1301731110_pnas.201301731SI.pdf [file 1301731110_pnas.201301731SI.pdf]

# Supporting Information

Schurig-Briccio et al. 10.1073/pnas.1301731110

## SI Materials and Methods

### Construction of Expression Plasmids and Site-Directed Mutagenesis.

The whole operon, containing the *norC*, *norB*, and an additional ORF following the *norB* gene, from *Thermus thermophilus* PRQ25 strain was cloned into pET22b (Ap<sup>r</sup>; Novagen) and into the shuttle vector pMKPbcbgaA (Km<sup>r</sup>). For purification purposes, an 8 His-tag was introduced in the C-terminal of the *norB* gene. A Quick Change site-directed mutagenesis kit (Stratagene) was used to construct the different point mutations. The final constructions in pMKPbcbgaA were transformed into *T. thermophilus* HB27 (ATCC BAA-163, Y. Koyama, Biomedical Research Institute, National Institute of Advanced Industrial Science and Technology, Tsukuba, Ibaraki, Japan) for homologous expression. For heterologous expression, the constructions in pET22b were transformed into *Escherichia coli* C43 (DE3) strain (Avidis), containing a plasmid carrying tRNA genes needed for reading rare codons (pRARE2) (Km<sup>r</sup>) (1) and pEC86 (Cm<sup>r</sup>) (2).

**Cell Growth, Enzyme Expression, and Purification.** The *T. thermophilus* (HB27) strain containing the plasmid to express cNOR (nitric oxide reductase) was grown in rich medium as previously described in (3). *E. coli* C43 cells containing the plasmids to express cNOR were grown in LB medium at 37 °C. The gene expression was induced as previously described (4). All of the purification procedures were carried in 100 mM Tris, pH 8, 150 mM NaCl buffer, and purification was followed as described previously (4). *T. thermophilus* cytochrome *c*<sub>552</sub> was prepared as previously described (5).

Protein expression and purification was examined by SDS/PAGE using a 4–20% gradient gel (Nusep). The sample was diluted in the same volume of Tris-glycine SDS sample buffer (Nusep) containing 715 mM β-mercaptoethanol and immediately without heating it was loaded into the gel. Spectra were acquired using an Agilent Technologies 8453 UV-visible spectrophotometer running ChemStation software. Protein concentration of the preparation was determined from reported extinction coefficient ( $\epsilon_{411} = 311 \text{ mM}^{-1}\text{cm}^{-1}$ ). Heme staining of the SDS/PAGE gel was used to identify NorC containing covalently attached heme *c* (6).

**Steady-State Activity.** The NO consumption rates were measured with an ISO-NO electrode equipped with ISO-NO Mark II (World Precision Instruments) in a 2-mL anaerobic reaction chamber at 42 °C. The data were recorded on a Duo 18 (World Precision Instruments). The assay solution contained 50 mM Na citrate, pH 6.0, 0.05% DDM, 5 mM ascorbate, 0.5 or 2.5 mM *N,N,N',N'*-tetramethyl-*p*-phenylenediamine (TMPD), 10 μM phenazine methosulfate (PMS), or 30 μM cytochrome *c*<sub>552</sub>, as indicated. After 20 min of Argon flux, NO-saturated solution was added to the reaction mix at a final concentration of ~25 μM. Once the background consumption of NO was stable, NO reduction (consumption) was initiated by the addition of cNOR (final concentration was between 0.1 and 0.5 μM). The enzyme turnover (mol electrons/min – mol enzyme) was calculated from the slope of the nitric oxide consumption traces.

**Sequence Analysis.** Genes encoding NORs were retrieved from the J. Craig Venter Institute, the National Center for Biotechnology Information, and Department of Energy Joint Genome Initiative databases. The sequences were aligned using MUSCLE (7) and manually edited using the cNOR crystal structure (PDB ID code 3O0R) as a guide. Conserved residues were identified with BIOEDIT.

The phylogenetic tree was built using RAxML and MrBayes via the CIPRES portal (8) using 323 cNOR amino acid sequences.

**Metal Analysis.** The metal content of the protein was determined by inductively coupled plasma-optical emission spectroscopy (ICP-OES) using a Spectro Genesis spectrometer. The buffer containing the purified cNOR from *T. thermophilus* (TicNOR) protein was exchanged by dialysis to 100 mM Tris buffer (pH 8) containing 150 mM NaCl, 0.05% DDM, 5% (vol/vol) glycerol, 0.25 mM EDTA, and 0.1 mM EGTA. Metal concentrations were calculated from regression lines of element standards run as samples rather than the regression lines produced by the Spectro software to avoid a 10% underestimation of element concentrations at low levels of the metals.

1. Kim HS, Nagore D, Nikaïdo H (2010) Multidrug efflux pump MdtBC of *Escherichia coli* is active only as a B2C heterotrimer. *J Bacteriol* 192(5):1377–1386.
2. Arslan E, Schulz H, Zufferey R, Künzler P, Thöny-Meyer L (1998) Overproduction of the *Bradyrhizobium japonicum* *c*-type cytochrome subunits of the *cbb3* oxidase in *Escherichia coli*. *Biochem Biophys Res Commun* 251(3):744–747.
3. Schurig-Briccio LA, Gennis RB (2012) Characterization of the PIB-Type ATPases present in *Thermus thermophilus*. *J Bacteriol* 194(15):4107–4113.
4. Lencina AM, Ding Z, Schurig-Briccio LA, Gennis RB (2013) Characterization of the Type III sulfide:quinone oxidoreductase from *Caldivirga maquilingensis* and its membrane binding. *Biochim Biophys Acta* 1827(3):266–275.
5. Fee JA, et al. (2000) Integrity of *Thermus thermophilus* cytochrome *c*<sub>552</sub> synthesized by *Escherichia coli* cells expressing the host-specific cytochrome *c* maturation genes,

ccmABCDEFGHI: Biochemical, spectral, and structural characterization of the recombinant protein. *Protein Sci* 9(11):2074–2084.

6. Thomas PE, Ryan D, Levin W (1976) An improved staining procedure for the detection of the peroxidase activity of cytochrome P-450 on sodium dodecyl sulfate polyacrylamide gels. *Anal Biochem* 75(1):168–176.
7. Edgar RC (2004) MUSCLE: A multiple sequence alignment method with reduced time and space complexity. *BMC Bioinformatics* 5:113.
8. Miller MA, Pfeiffer W, Schwartz T (2010) Creating the CIPRES Science Gateway for inference of large phylogenetic trees. *Proceedings of the Gateway Computing Environments Workshop (GCE)* Nov 14, 2010, New Orleans, LA, pp 1–8.

**Table S1. Conservation of key residues among cNORs and their predicted function**

| PacNOR residue | TtcNOR residue | % Conserved (replacements) |                        | Suggested role                                    |
|----------------|----------------|----------------------------|------------------------|---------------------------------------------------|
| NorB subunit   |                |                            |                        |                                                   |
| N54            | N55            | 76                         | H, D, S, M, G, E, A    | Proton pathway?                                   |
| R57            | R58            | 97                         | K                      |                                                   |
| H60            | H61            | 100                        |                        | Heme <i>b</i> Fe axial ligand                     |
| E135           | E134           | >80                        | E, K, P, H, G, V       | Ca ligand                                         |
| E137           | E137           | >90                        | E, D                   | Proton pathway?; stabilize Ca site                |
| D198           | D198           | >85                        | E, Q, S, A             | Proton pathway?                                   |
| H207           | H207           | 100                        |                        | Fe <sub>B</sub> ligand                            |
| E211           | E211           | 100                        |                        | Fe <sub>B</sub> ligand                            |
| E215           | E215           | >95                        | M, V, I                |                                                   |
| S277           | S277           | 100                        |                        | Proton pathway?                                   |
| E280           | E280           | >90                        | Q                      | Proton pathway?                                   |
| T330           | T330           | 100                        |                        | Proton pathway?                                   |
| N335           | N335           | 100                        |                        | H-bond to heme <i>b</i> <sub>3</sub> propionate-A |
| H339           | H339           | 100                        |                        | H-bond to heme <i>b</i> <sub>3</sub> propionate-A |
| H347           | H347           | 100                        |                        | Heme <i>b</i> <sub>3</sub> Fe axial ligand        |
| H349           | H349           | 100                        |                        | Heme <i>b</i> Fe axial ligand                     |
| H258           | H258           | 100                        |                        | Fe <sub>B</sub> ligand                            |
| H259           | H259           | 100                        |                        | Fe <sub>B</sub> ligand                            |
| NorC subunit   |                |                            |                        |                                                   |
| N60            | N124           | 55                         | S, D, A, G,T, E        | Proton pathway?                                   |
| T66            | T130           | >80                        | S, A                   | Proton pathway?                                   |
| E57            | Q121           | 75                         | Q, H                   | Proton pathway?                                   |
| Y73            | Y137           | 100                        |                        | Ca ligand                                         |
| E77            | D141           | 35                         | E                      | Proton pathway?                                   |
| N80            | R144           | <10                        | K, N, H, Q, D, E       | Proton pathway?                                   |
| R84            | D148           | <10                        | R, K, Q, T, E, L, H, D | Proton pathway?                                   |
| C61            | C125           | 100                        |                        | Heme <i>c</i> binding                             |
| C64            | C128           | 100                        |                        | Heme <i>c</i> binding                             |
| H65            | H129           | 100                        |                        | Heme <i>c</i> Fe axial ligand                     |
| E145           | D209           | >50                        | N, E, K, R, P          | Proton pathway?                                   |
| M112           | M185           | 93                         | H                      | Heme <i>c</i> Fe axial ligand                     |

**Fig. S1.** (A) Reduced-minus-oxidized absorption spectra of TtcNOR expressed in *E. coli*. Protein expressed in the presence of the pEC86 plasmid (1) to enhance the assembly of heme *c* (solid line) and in the absence of pEC86 (dashed line). (B) SDS/PAGE TtcNOR expressed in *E. coli*. Protein was expressed in a strain with the pEC86 plasmid (lanes 2 and 4) or without pEC86 (lanes 1 and 3). Lanes 1 and 2 were stained with Coomassie Brilliant and lanes 3 and 4 were stained for heme *c* (2).

#### [Fig. S1](#)

1. Arslan E, Schulz H, Zufferey R, Künzler P, Thöny-Meyer L (1998) Overproduction of the *Bradyrhizobium japonicum* *c*-type cytochrome subunits of the *cbb3* oxidase in *Escherichia coli*. *Biochem Biophys Res Commun* 251(3):744–747.
2. Thomas PE, Ryan D, Levin W (1976) An improved staining procedure for the detection of the peroxidase activity of cytochrome P-450 on sodium dodecyl sulfate polyacrylamide gels. *Anal Biochem* 75(1):168–176.

**Fig. S2.** NO reductase activity of the wild-type and H259F mutant TtcNOR. (A) NO reductase activity of TtcNOR. (B) Inhibition of the NO reductase activity of TtcNOR by cyanide. (C) Demonstration of the lack of NO reductase activity of the H259F mutant of TtcNOR.

#### [Fig. S2](#)

**Fig. S3.** Phylogenetic tree of different cNOR sequences. The scale bar corresponds to 0.1 changes per amino acid. Blue star: *Pseudomonas aeruginosa* (Gamma-), *Paracoccus denitrificans* (Alpha-), *Pseudomonas stutzeri* (Gamma-), *Halomonas halodenitrificans* (Gamma-) and *Roseobacter denitrificans* (Alpha-) cNORs belong to the *Proteobacteria* phylum. Red star: TtcNOR belongs to the *Thermus* phylum.

#### [Fig. S3](#)

**Fig. 54.** Oxidized and reduced absorption spectra of different *TtcNOR* mutants expressed in *E. coli*.

[Fig. 54](#)

**Fig. 55.** Sequence alignment of cNOR family. Residues conserved at the 99% level are marked with an asterisk (\*). Residues mutated in this work are identified with a caret (^).

[Fig. 55](#)
