# Supplementary material
Source: PubMed Central journal article supplement (PMC3732958)

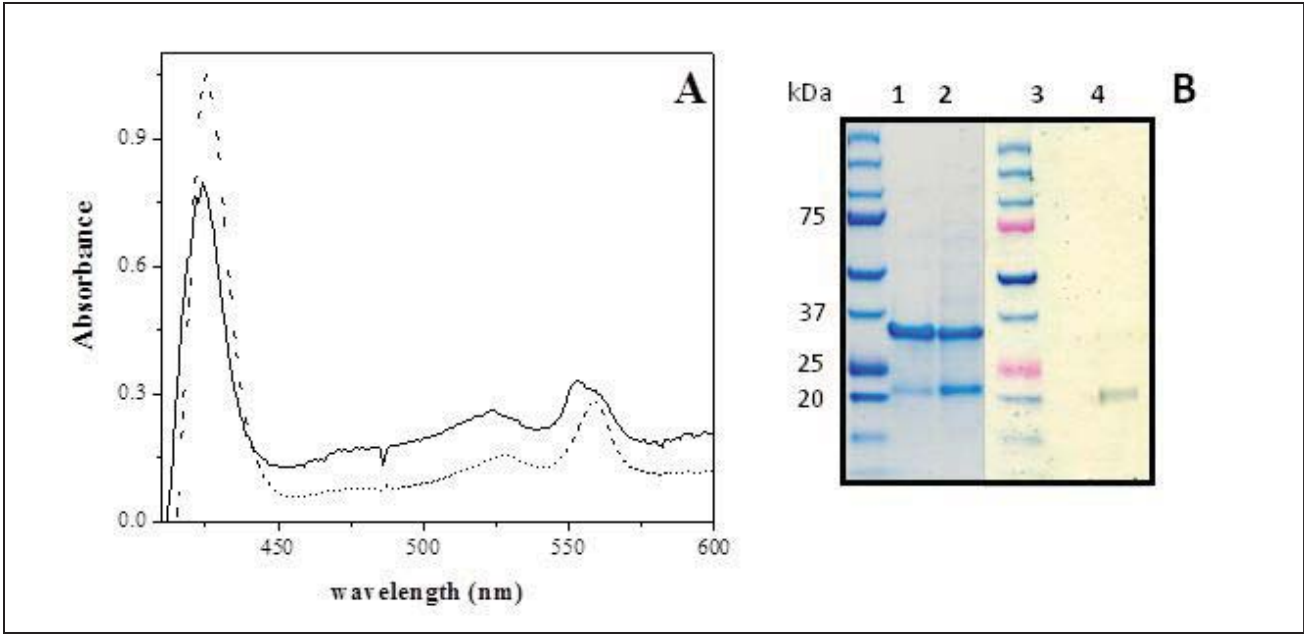

Supplement: 1301731110_sfig01.pdf [file 1301731110_sfig01.pdf]
